# Supplementary material
Source: PubMed Central journal article supplement (PMC2976024)

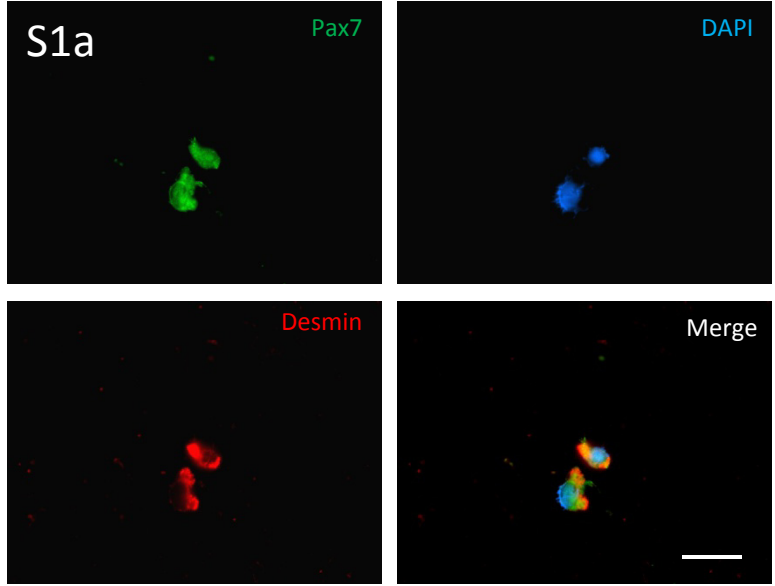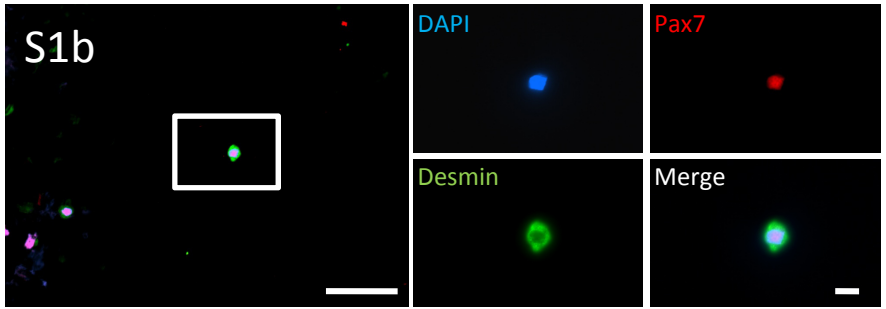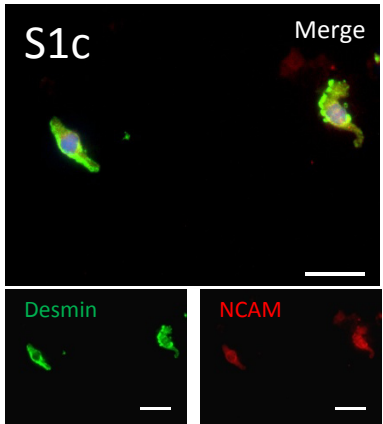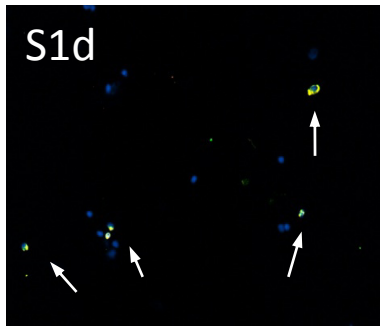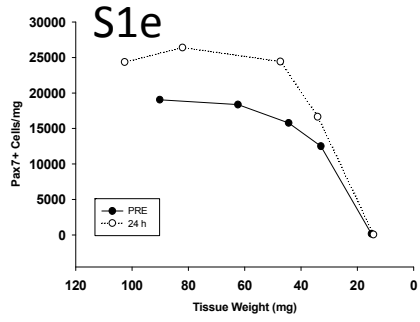

Secondary Only Control

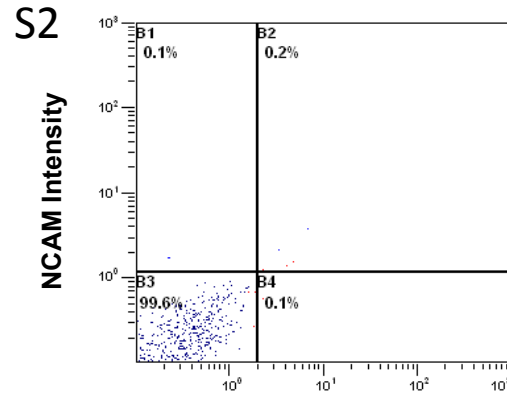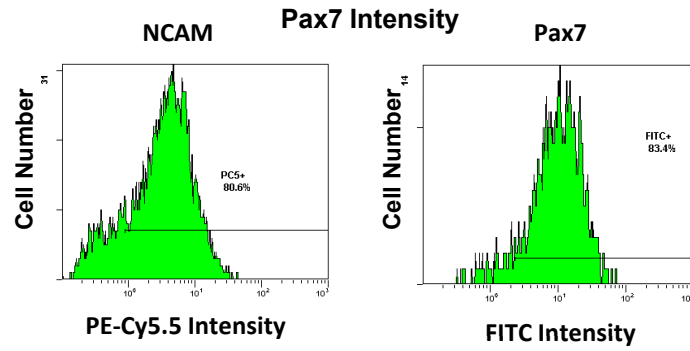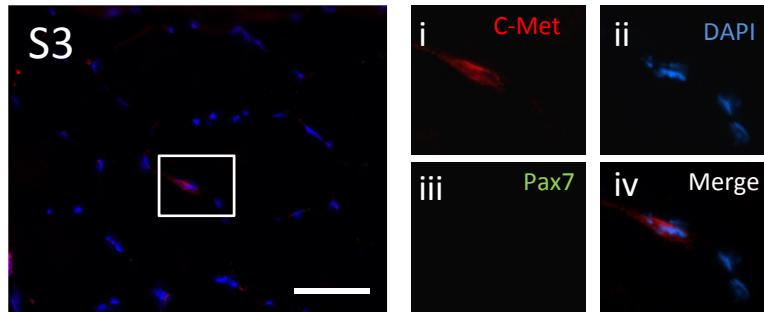

Supplement: tjp0588-3307-SD1.pdf [file tjp0588-3307-SD1.pdf]
